# Supplementary material
Source: publisher figshare collection journal article supplement (https://tandf.figshare.com/articles/dataset/_/963516)
Supplement: Supplementary file 2 [file 1]

SUPPLEMENTAL DATA 2

FOSSIL SIRENIA OF THE WEST ATLANTIC AND CARIBBEAN REGION. IX.

*METAXYTHERIUM ALBIFONTANUM*, SP. NOV.

JORGE VÉLEZ-JUARBE<sup>\*,1,†</sup> and DARYL P. DOMNING<sup>1,2</sup>

<sup>1</sup>Department of Paleobiology, National Museum of Natural History, Smithsonian

Institution, Washington, D.C. 20560, U.S.A., velezjuarbe@gmail.com;

<sup>2</sup>Laboratory of Evolutionary Biology, Department of Anatomy, Howard University,

Washington, D.C. 20059, U.S.A.; ddomning@howard.edu

\*Corresponding author. <sup>†</sup>Current address: Florida Museum of Natural History, University of Florida, Gainesville, Florida 32611, U.S.A.

APPENDIX 2. Character-taxon matrix used for phylogenetic analysis. The list includes 2 outgroup and 36 ingroup taxa.

*Phosphatherium escuilliei*

|   |   |   |   |   |   |   |   |   |   |   |   |   |   |
|---|---|---|---|---|---|---|---|---|---|---|---|---|---|
| 0 | 0 | 0 | 0 | 0 | 0 | 1 | 0 | ? | 0 | 0 | ? | ? | ? |
| 0 | 0 | 0 | 0 | 0 | 0 | 0 | ? | 0 | 0 | 0 | 0 | ? | ? |
| 0 | 0 | ? | 0 | ? | 0 | 0 | 0 | 0 | 0 | ? | 0 | 0 | 0 |
| 0 | 0 | 0 | 0 | 0 | 0 | 0 | 0 | 0 | 0 | ? | 0 | 0 | 0 |
| 0 | 0 | 0 | 0 | 0 | 0 | 0 | 1 | 0 | 0 | 0 | 0 | 0 |   |

*Cornwallius sookensis*

|   |   |   |   |   |   |   |   |   |   |   |   |   |   |
|---|---|---|---|---|---|---|---|---|---|---|---|---|---|
| 0 | 0 | 0 | 0 | 0 | 0 | 0 | 0 | 0 | 0 | 0 | ? | 0 | 0 |
| 0 | 0 | 0 | 0 | 0 | 0 | 0 | 0 | 1 | 0 | 0 | ? | 1 | 0 |
| 0 | 0 | 0 | ? | 0 | 0 | 0 | 0 | 1 | 0 | 1 | 0 | 0 | 0 |
| ? | 0 | 0 | 0 | 0 | 0 | 0 | 0 | ? | 0 | 0 | 0 | 0 | ? |
| 0 | 0 | 0 | ? | 0 | 1 | 1 | 1 | 0 | 0 | 0 | 0 | 0 |   |

*Prorastomus sirenoides*

|   |   |   |   |   |   |   |   |   |   |   |   |   |   |
|---|---|---|---|---|---|---|---|---|---|---|---|---|---|
| 1 | 0 | 0 | 1 | 1 | 1 | 1 | 0 | 0 | ? | 0 | 1 | 0 | 0 |
| 0 | 0 | 0 | 0 | 0 | 0 | 0 | 0 | 0 | 0 | 0 | 0 | 1 | 1 |
| 0 | 0 | 0 | 0 | 0 | 0 | 0 | 0 | ? | 0 | 0 | 0 | 0 | 0 |
| 0 | 1 | 0 | 0 | 0 | 1 | 0 | 0 | 0 | 0 | 0 | 0 | 0 | ? |
| 0 | 0 | 0 | ? | 0 | 0 | 0 | 0 | 0 | 0 | 0 | 1 | 0 |   |

*Ashokia antiqua*

|   |   |   |   |   |   |   |   |   |   |   |   |   |   |
|---|---|---|---|---|---|---|---|---|---|---|---|---|---|
| ? | 0 | 0 | 1 | 1 | ? | 1 | ? | 0 | 0 | 0 | 1 | 0 | 0 |
| 0 | 0 | 0 | 0 | 0 | 0 | 1 | 0 | 0 | 2 | 0 | 0 | 1 | 1 |
| 0 | 0 | 0 | 2 | 0 | 0 | 0 | 0 | 0 | 0 | 1 | 1 | ? | ? |
| 0 | 0 | 0 | 1 | 1 | 1 | ? | ? | ? | ? | ? | ? | ? | ? |
| ? | ? | ? | ? | ? | ? | 0 | ? | ? | 0 | 0 | 1 | ? |   |

*Miosiren kocki*

|   |   |   |   |   |   |   |   |   |   |   |   |   |   |
|---|---|---|---|---|---|---|---|---|---|---|---|---|---|
| 1 | 0 | 0 | 1 | 1 | 1 | 0 | 1 | 0 | 1 | 0 | 1 | 0 | 0 |
| 0 | 1 | 0 | 0 | 0 | 0 | 1 | 1 | 0 | 2 | 0 | 0 | 2 | 1 |
| 1 | 0 | 0 | 2 | 0 | 2 | 0 | 0 | 0 | 0 | 2 | 0 | 0 | 0 |
| 1 | 1 | 1 | 1 | 1 | 1 | ? | ? | ? | ? | ? | ? | ? | 1 |
| 0 | 2 | 0 | 0 | 1 | 2 | 1 | 1 | 2 | 0 | 0 | 1 | 1 |   |

*Eotheroides aegyptiacum*

|   |   |   |   |   |   |   |   |   |   |   |   |   |   |
|---|---|---|---|---|---|---|---|---|---|---|---|---|---|
| ? | 0 | 0 | 1 | 1 | 1 | 0 | ? | 0 | 0 | 0 | 1 | ? | 0 |
| 0 | 0 | 0 | 0 | 0 | 0 | 1 | 0 | 0 | 1 | 0 | 0 | 0 | 1 |
| 1 | 1 | 0 | 0 | 0 | ? | 0 | ? | ? | ? | 0 | 0 | 0 | ? |
| 1 | 1 | 1 | ? | 1 | 1 | 1 | 1 | 1 | 1 | 1 | 0 | 0 | ? |
| ? | ? | ? | ? | 0 | 1 | 0 | 1 | 0 | 0 | 0 | 1 | 1 |   |

*Halitherium taulannense*

|   |   |   |   |   |   |   |   |   |   |   |   |   |   |
|---|---|---|---|---|---|---|---|---|---|---|---|---|---|
| 2 | 0 | 0 | 1 | 1 | 1 | ? | 1 | 0 | 0 | 0 | 1 | 0 | 0 |
| 0 | 0 | 0 | 0 | 0 | 0 | 1 | 0 | 0 | 2 | 0 | 0 | 0 | 1 |
| 1 | 1 | 0 | 1 | 0 | 0 | 0 | 0 | 0 | 0 | 0 | 1 | 1 | 0 |
| 1 | 1 | 1 | 1 | 1 | 1 | 1 | 0 | 2 | 1 | 1 | 0 | 0 | 0 |
| 0 | 1 | 0 | 0 | 0 | 1 | 0 | 1 | 0 | 0 | 0 | 1 | 1 |   |

*Halitherium schinzii*

|   |   |   |   |   |   |   |   |   |   |   |   |   |   |
|---|---|---|---|---|---|---|---|---|---|---|---|---|---|
| 2 | 0 | 0 | 1 | 1 | 1 | 0 | 1 | 0 | 0 | 0 | 1 | 0 | 0 |
| 0 | 0 | 0 | 0 | 0 | 0 | 1 | 0 | 0 | 2 | 0 | 0 | 0 | 1 |

|   |   |   |   |   |   |   |   |   |   |   |   |   |   |
|---|---|---|---|---|---|---|---|---|---|---|---|---|---|
| 1 | 1 | 0 | 1 | 0 | 1 | ? | 0 | 0 | 0 | ? | 1 | 1 | 0 |
| 1 | 1 | 1 | 1 | 1 | 1 | 1 | 0 | 2 | 1 | 1 | 0 | 1 | 0 |
| 0 | 1 | 0 | 0 | 1 | 2 | 1 | 1 | 0 | 0 | 0 | 1 | 1 |   |

*Halitherium christolii*

|   |   |   |   |   |   |   |   |   |   |   |   |   |   |
|---|---|---|---|---|---|---|---|---|---|---|---|---|---|
| ? | ? | ? | 1 | ? | ? | 0 | ? | ? | 0 | ? | 1 | ? | ? |
| ? | 0 | 0 | 0 | 0 | 0 | 1 | ? | 0 | ? | ? | ? | 0 | 1 |
| 1 | 1 | 0 | 1 | 0 | ? | ? | ? | ? | ? | ? | ? | ? | ? |
| 1 | 1 | 1 | 1 | ? | 1 | 3 | 1 | 2 | 1 | 1 | 1 | 1 | ? |
| ? | ? | ? | ? | 1 | 2 | 1 | 1 | 0 | 0 | 0 | 1 | ? |   |

USNM 542417

|   |   |   |   |   |   |   |   |   |   |   |   |   |   |
|---|---|---|---|---|---|---|---|---|---|---|---|---|---|
| 2 | 0 | 0 | 1 | 1 | 1 | 0 | ? | 0 | 0 | 0 | 1 | 0 | 0 |
| 1 | 0 | 0 | 0 | 0 | 0 | 1 | 0 | 0 | 2 | 0 | 0 | 0 | 1 |
| 1 | 1 | 0 | 1 | 0 | 1 | 0 | 0 | 0 | 0 | 1 | 1 | 1 | 0 |
| 1 | 1 | 1 | 1 | 1 | 1 | 3 | 1 | 2 | 1 | 1 | 1 | 1 | ? |
| 0 | 0 | 0 | ? | 1 | 2 | 2 | 1 | 0 | 0 | 0 | 1 | 2 |   |

*Metaxytherium krahuletzki*

|   |   |   |   |   |   |   |   |   |   |   |   |   |   |
|---|---|---|---|---|---|---|---|---|---|---|---|---|---|
| 2 | 0 | 0 | 1 | 1 | 1 | 1 | 1 | 0 | 0 | 0 | 1 | 0 | 0 |
| 1 | 1 | 0 | 0 | 0 | 0 | 1 | 1 | 0 | 2 | 0 | 0 | 0 | 1 |
| 1 | 1 | 0 | 1 | 0 | 1 | 0 | 0 | 0 | 0 | 1 | 1 | 1 | 0 |
| 1 | 1 | 1 | 1 | 1 | 1 | 3 | 1 | 2 | 1 | 1 | 1 | 1 | 0 |
| 0 | 0 | 0 | 0 | 1 | 2 | 2 | 1 | 0 | 0 | 0 | 1 | 2 |   |

*Metaxytherium medium*

|   |   |   |   |   |   |   |   |   |   |   |   |   |   |
|---|---|---|---|---|---|---|---|---|---|---|---|---|---|
| 2 | 0 | 0 | 1 | 1 | 1 | 1 | 1 | 0 | 0 | 0 | 1 | 0 | 0 |
| 1 | 1 | 0 | 0 | 0 | 0 | 1 | 1 | 1 | 2 | 0 | 0 | 0 | 1 |
| 1 | 1 | 0 | 1 | 0 | 2 | 0 | 0 | 0 | 0 | 1 | 1 | 1 | 0 |
| 1 | 1 | 1 | 1 | 1 | 1 | 3 | 1 | 2 | 1 | 1 | 1 | 1 | 0 |
| 0 | 0 | 0 | 0 | 1 | 2 | 2 | 1 | 0 | 0 | 0 | 1 | 2 |   |

*Metaxytherium serresii*

|   |   |   |   |   |   |   |   |   |   |   |   |   |   |
|---|---|---|---|---|---|---|---|---|---|---|---|---|---|
| 2 | 0 | 0 | 1 | 1 | 1 | 1 | 1 | 0 | 0 | 0 | 1 | 0 | 0 |
| 1 | 1 | 0 | 0 | 0 | 0 | 1 | 1 | 1 | 3 | 0 | 0 | 0 | 1 |
| 1 | 1 | 0 | 1 | 0 | 2 | 0 | 0 | 0 | 0 | 1 | 1 | 1 | 1 |
| 1 | 1 | 1 | 1 | 1 | 1 | 3 | 1 | 2 | 1 | 1 | 1 | 1 | 0 |
| 0 | 1 | 0 | 0 | 1 | 2 | 2 | 1 | 0 | 0 | 0 | 1 | 2 |   |

*Metaxytherium subapenninum*

|   |   |   |   |   |   |   |   |   |   |   |   |   |   |
|---|---|---|---|---|---|---|---|---|---|---|---|---|---|
| 2 | 0 | 0 | 1 | 1 | 1 | 1 | 2 | 0 | 0 | 0 | 1 | 0 | 0 |
| 1 | 1 | 0 | 0 | 0 | 0 | 1 | 1 | 1 | 3 | 0 | 0 | 0 | 1 |
| 1 | 1 | 0 | 1 | 0 | 2 | 1 | 0 | 0 | 0 | 1 | 1 | 1 | 1 |
| 1 | 1 | 1 | 1 | 1 | 1 | 3 | 1 | 2 | 1 | 1 | 1 | 1 | 0 |
| 0 | 2 | 0 | 0 | 1 | 2 | 2 | 1 | 0 | 0 | 0 | 1 | 2 |   |

*Metaxytherium crataegense*

|   |   |   |   |   |   |   |   |   |   |   |   |   |   |
|---|---|---|---|---|---|---|---|---|---|---|---|---|---|
| 2 | 0 | 0 | 1 | 1 | 1 | 1 | 1 | 0 | 0 | 0 | 1 | 0 | 0 |
| 1 | 1 | 0 | 0 | 0 | 0 | 1 | 1 | 1 | 2 | 0 | 0 | 0 | 1 |
| 1 | 1 | 0 | 1 | 0 | 2 | 0 | 0 | 0 | 0 | 1 | 1 | 1 | 0 |
| 1 | 1 | 1 | 1 | 1 | 1 | 3 | 1 | 2 | 1 | 1 | 1 | 1 | 0 |
| 0 | 0 | 0 | 0 | 1 | 2 | 2 | 1 | 0 | 0 | 0 | 1 | 2 |   |

*Metaxytherium floridanum*

|   |   |   |   |   |   |   |   |   |   |   |   |   |   |
|---|---|---|---|---|---|---|---|---|---|---|---|---|---|
| 2 | 0 | 0 | 1 | 1 | 1 | 1 | 1 | 0 | 0 | 0 | 1 | 0 | 0 |
| 1 | 1 | 0 | 0 | 0 | 0 | 1 | 1 | 1 | 2 | 0 | 0 | 0 | 1 |
| 1 | 1 | 0 | 1 | 0 | 2 | 0 | 0 | 0 | 0 | 1 | 1 | 1 | 0 |
| 1 | 1 | 1 | 1 | 1 | 1 | 3 | 1 | 2 | 1 | 1 | 1 | 1 | 0 |
| 0 | 0 | 0 | 0 | 1 | 2 | 2 | 1 | 0 | 0 | 0 | 1 | 2 |   |

*Metaxytherium arctodites*

|   |   |   |   |   |   |   |   |   |   |   |   |   |   |
|---|---|---|---|---|---|---|---|---|---|---|---|---|---|
| 2 | 0 | 0 | 1 | 1 | 1 | 0 | 1 | 0 | 0 | 0 | 1 | 1 | 0 |
| 1 | 1 | 0 | 0 | 0 | 0 | 1 | 1 | 1 | 2 | 0 | 0 | 0 | 1 |

|   |   |   |   |   |   |   |   |   |   |   |   |   |   |
|---|---|---|---|---|---|---|---|---|---|---|---|---|---|
| 1 | 1 | 0 | 1 | 0 | 2 | 0 | 0 | 0 | 0 | 1 | 1 | 2 | 0 |
| 1 | 1 | 1 | 1 | 1 | 1 | 3 | 1 | 2 | 1 | 1 | 1 | 1 | 0 |
| 0 | 0 | 0 | 0 | 1 | 2 | 2 | 1 | 0 | 0 | 0 | 1 | 2 |   |

*Dusisiren jordani*

|   |   |   |   |   |   |   |   |   |   |   |   |   |   |
|---|---|---|---|---|---|---|---|---|---|---|---|---|---|
| 2 | 0 | 0 | 1 | 1 | 1 | 1 | 1 | 0 | 0 | 0 | 1 | 1 | 0 |
| 1 | 1 | 0 | 0 | 0 | 0 | 1 | 1 | 1 | 3 | 1 | 0 | 0 | 1 |
| 1 | 2 | 0 | 1 | 0 | 2 | 1 | 0 | 0 | 0 | 2 | 0 | 1 | 0 |
| 1 | 1 | 1 | 1 | 1 | 1 | 2 | 1 | 2 | 1 | 1 | 0 | 1 | ? |
| 1 | 0 | ? | ? | 1 | 2 | 2 | 1 | 0 | 0 | 0 | 1 | 2 |   |

*Hydrodamalis cuestae*

|   |   |   |   |   |   |   |   |   |   |   |   |   |   |
|---|---|---|---|---|---|---|---|---|---|---|---|---|---|
| 2 | 0 | 0 | 1 | 1 | 1 | 1 | 2 | 1 | 0 | 0 | 1 | 2 | 1 |
| 1 | 1 | 0 | 0 | 0 | 0 | 1 | 1 | 1 | 3 | 1 | 0 | 0 | 2 |
| 1 | 2 | 0 | 1 | 0 | 2 | 1 | 0 | 0 | 0 | 2 | 1 | 1 | 0 |
| 1 | 1 | 1 | 1 | 1 | 1 | 2 | 1 | 2 | 1 | 2 | 0 | 1 | ? |
| 1 | 0 | ? | ? | 1 | 2 | 2 | 1 | ? | 0 | 1 | 1 | 2 |   |

*Metaxytherium albifontanum* sp. nov.

|   |   |   |   |   |   |   |   |   |   |   |   |   |   |
|---|---|---|---|---|---|---|---|---|---|---|---|---|---|
| 2 | 0 | 0 | 1 | 1 | 1 | ? | 1 | 0 | 0 | 0 | 1 | 0 | 0 |
| 1 | 1 | 0 | 0 | 0 | 0 | 1 | 1 | 1 | 2 | 0 | 0 | 0 | 1 |
| 1 | 1 | 0 | 1 | 0 | 1 | 0 | 0 | 0 | 0 | 1 | 1 | 1 | 0 |
| 1 | 1 | 1 | 1 | 1 | 1 | 3 | ? | 2 | 1 | 1 | 1 | 1 | 0 |
| 0 | 0 | 0 | 0 | 1 | 2 | 2 | 1 | 0 | 0 | 0 | 1 | 2 |   |

*Caribosiren turneri*

|   |   |   |   |   |   |   |   |   |   |   |   |   |   |
|---|---|---|---|---|---|---|---|---|---|---|---|---|---|
| 2 | 0 | 0 | 1 | 1 | 1 | 0 | 1 | 0 | 0 | 0 | 1 | 0 | 0 |
| 1 | 0 | 0 | 0 | 0 | 0 | 1 | ? | ? | ? | ? | ? | 0 | 1 |
| 1 | 1 | 0 | 1 | 0 | ? | 0 | 0 | 0 | ? | 1 | 1 | 1 | 0 |
| 1 | 1 | 1 | 1 | 1 | 1 | ? | ? | ? | ? | ? | ? | ? | ? |
| 1 | 0 | ? | ? | 1 | 2 | 2 | 1 | 0 | 0 | 0 | 1 | 2 |   |

*Crenatosiren olseni*

|   |   |   |   |   |   |   |   |   |   |   |   |   |   |
|---|---|---|---|---|---|---|---|---|---|---|---|---|---|
| 2 | 0 | 0 | 1 | 1 | 1 | 0 | 1 | 0 | 0 | 0 | 1 | 0 | 0 |
| 1 | 1 | 1 | 0 | 0 | 0 | 1 | 0 | 0 | 2 | 0 | 0 | 0 | 1 |
| 1 | 1 | 0 | 1 | 0 | 1 | 0 | 0 | 0 | 1 | 1 | 1 | ? | 0 |
| 1 | 1 | 1 | 1 | 1 | 1 | 3 | 1 | 2 | 1 | 1 | 1 | 1 | 0 |
| 0 | 1 | 0 | 0 | 1 | 2 | 2 | 1 | 0 | 0 | 0 | 1 | 2 |   |

*Nanosiren sanchezi*

|   |   |   |   |   |   |   |   |   |   |   |   |   |   |
|---|---|---|---|---|---|---|---|---|---|---|---|---|---|
| 2 | 0 | 1 | 1 | ? | 1 | 0 | ? | 1 | 0 | 0 | 1 | 0 | 0 |
| 1 | ? | 1 | 1 | ? | 1 | 1 | 1 | 1 | 2 | 0 | 1 | 0 | 1 |

|   |   |   |   |   |   |   |   |   |   |   |   |   |   |
|---|---|---|---|---|---|---|---|---|---|---|---|---|---|
| 1 | 3 | 0 | 1 | 0 | 1 | ? | 0 | 0 | 1 | ? | ? | ? | 0 |
| ? | ? | ? | ? | 2 | 1 | ? | ? | ? | ? | ? | ? | 1 | 0 |
| 0 | 0 | 0 | 0 | 1 | 2 | 2 | 1 | 0 | 0 | 0 | 1 | 2 |   |

*Nanosiren garciae*

|   |   |   |   |   |   |   |   |   |   |   |   |   |   |
|---|---|---|---|---|---|---|---|---|---|---|---|---|---|
| 2 | ? | ? | 1 | ? | 1 | 0 | ? | 1 | 0 | 0 | 1 | 0 | 0 |
| 1 | ? | 1 | 1 | ? | 1 | 1 | 1 | 1 | 2 | 0 | 1 | 0 | 1 |
| 1 | 3 | 0 | 1 | 0 | 1 | ? | 0 | 0 | 1 | ? | ? | ? | 0 |
| 1 | 2 | 1 | 1 | 2 | 1 | 3 | 1 | 2 | 1 | 1 | 1 | ? | ? |
| 0 | 0 | ? | ? | 1 | 2 | 2 | 1 | ? | 0 | 0 | 1 | 2 |   |

*Dugong dugon*

|   |   |   |   |   |   |   |   |   |   |   |   |   |   |
|---|---|---|---|---|---|---|---|---|---|---|---|---|---|
| 2 | 0 | 0 | 1 | 1 | 1 | 0 | 2 | 1 | 1 | 0 | 1 | 0 | 0 |
| 1 | 1 | 2 | 2 | 1 | 1 | 1 | 1 | 1 | 2 | 0 | 0 | 0 | 1 |
| 1 | 3 | 0 | 1 | 0 | 2 | 1 | 1 | 0 | 1 | 1 | 2 | 1 | 0 |
| 1 | 1 | 1 | 1 | 1 | 1 | 3 | 1 | 2 | 1 | 1 | 1 | 1 | 1 |
| 0 | 2 | 0 | 1 | 1 | 2 | 2 | 1 | 0 | 0 | 0 | 1 | 2 |   |

USNM 540765

|   |   |   |   |   |   |   |   |   |   |   |   |   |   |
|---|---|---|---|---|---|---|---|---|---|---|---|---|---|
| 2 | 1 | 0 | 1 | 1 | 1 | 0 | 1 | 0 | 0 | 0 | 1 | 0 | 0 |
| 1 | 0 | 1 | 2 | 0 | 0 | 1 | 0 | 0 | 2 | 0 | 0 | 0 | 1 |
| 1 | 1 | 0 | 1 | 0 | 2 | 0 | 1 | 0 | 0 | 1 | 2 | 1 | 0 |
| 1 | 1 | 1 | 1 | 1 | 1 | ? | ? | ? | ? | ? | ? | ? | 1 |
| 0 | 2 | 2 | 1 | 1 | 2 | 2 | 1 | 0 | 0 | 0 | 1 | 2 |   |

*Bhartisiren indica*

|   |   |   |   |   |   |   |   |   |   |   |   |   |   |
|---|---|---|---|---|---|---|---|---|---|---|---|---|---|
| 2 | 1 | 0 | 1 | 1 | 1 | 0 | 1 | 0 | 0 | 0 | 1 | 0 | 0 |
| 1 | 3 | 1 | 0 | 1 | 0 | 1 | 0 | 0 | 2 | 0 | 0 | 0 | 1 |
| 1 | 1 | 0 | 1 | 0 | 2 | 0 | 1 | 1 | 1 | 1 | 2 | 2 | 0 |
| 1 | 1 | 1 | 1 | ? | 1 | ? | ? | 2 | 1 | 1 | ? | ? | ? |
| 0 | 2 | 0 | ? | 1 | 2 | 2 | 1 | 0 | 0 | 0 | 1 | 2 |   |



*Bharatisiren kachchhensis*

|   |   |   |   |   |   |   |   |   |   |   |   |   |   |
|---|---|---|---|---|---|---|---|---|---|---|---|---|---|
| 2 | 1 | 0 | 1 | 1 | 2 | 0 | 1 | 0 | 0 | 1 | 1 | 0 | 0 |
| 1 | 0 | 1 | 2 | 1 | 0 | 1 | 1 | 0 | 2 | 0 | ? | 0 | 1 |
| 1 | ? | 0 | 1 | 0 | 2 | 0 | 1 | 0 | 1 | 1 | 2 | 2 | 0 |
| 1 | 1 | 1 | 1 | ? | 1 | ? | ? | ? | ? | ? | ? | ? | 1 |
| 0 | 2 | 0 | ? | 1 | 2 | 2 | 1 | 0 | 0 | 0 | 1 | 2 |   |

*Domningia sodhae*

|   |   |   |   |   |   |   |   |   |   |   |   |   |   |
|---|---|---|---|---|---|---|---|---|---|---|---|---|---|
| 2 | 2 | 0 | 1 | 1 | 1 | 0 | 1 | 0 | 0 | 0 | 1 | 0 | 0 |
| 1 | 3 | 1 | 2 | 0 | 0 | 1 | 0 | 0 | 2 | 0 | ? | 0 | 1 |
| 1 | 1 | 1 | 1 | 0 | 2 | 0 | 1 | 0 | 1 | 1 | 1 | 2 | 0 |
| 1 | 2 | 1 | 1 | ? | 1 | 3 | 1 | 2 | 1 | ? | 1 | 1 | ? |
| 0 | 2 | 1 | ? | 1 | 2 | 2 | 1 | 0 | 0 | 0 | 1 | 2 |   |

*Kutchisiren cylindrica*

|   |   |   |   |   |   |   |   |   |   |   |   |   |   |
|---|---|---|---|---|---|---|---|---|---|---|---|---|---|
| 2 | 1 | 0 | 1 | 1 | 1 | 0 | 1 | 0 | 0 | 0 | 1 | 0 | 0 |
| 1 | 1 | 1 | 2 | 0 | 0 | 1 | 1 | 0 | ? | ? | 0 | ? | 1 |
| 1 | 1 | ? | 1 | 0 | 2 | 0 | 1 | ? | 1 | 1 | 0 | 2 | 0 |
| 1 | 2 | 1 | 1 | 1 | 1 | 3 | 0 | ? | ? | 1 | 1 | ? | 1 |
| 0 | 2 | 2 | 1 | 1 | 2 | 2 | 1 | 0 | 0 | 0 | 1 | 2 |   |

*Dioplotherium manigaulti*

|   |   |   |   |   |   |   |   |   |   |   |   |   |   |
|---|---|---|---|---|---|---|---|---|---|---|---|---|---|
| 2 | 2 | 0 | 1 | 1 | 1 | 0 | 1 | 0 | 0 | 1 | 1 | 0 | 0 |
| 1 | 3 | 1 | 2 | 0 | 1 | 1 | 0 | 0 | 2 | 0 | 0 | ? | ? |
| 1 | ? | ? | ? | 0 | 2 | 0 | 1 | 1 | 1 | 1 | 1 | 2 | 0 |
| 1 | 2 | 1 | 1 | 1 | 1 | ? | ? | ? | ? | ? | ? | ? | 1 |
| 0 | 2 | 2 | 0 | 1 | 2 | 2 | 1 | 0 | 0 | 0 | 1 | 2 |   |

*Dioplotherium allisoni*

|   |   |   |   |   |   |   |   |   |   |   |   |   |   |
|---|---|---|---|---|---|---|---|---|---|---|---|---|---|
| 2 | 2 | 0 | 1 | 1 | 2 | 0 | 2 | 0 | ? | ? | 1 | 0 | 0 |
| 1 | 3 | 1 | 1 | 1 | 0 | 1 | 0 | 0 | ? | ? | 0 | 0 | 1 |

|   |   |   |   |   |   |   |   |   |   |   |   |   |   |
|---|---|---|---|---|---|---|---|---|---|---|---|---|---|
| 1 | 1 | 1 | 1 | 1 | 2 | 0 | 1 | 1 | 1 | 1 | 1 | 1 | 0 |
| 1 | 2 | 1 | 1 | ? | 1 | 3 | 0 | 2 | 1 | 1 | 1 | 1 | 1 |
| 0 | 2 | 2 | 1 | 1 | 2 | 2 | 1 | 0 | 0 | 0 | 1 | 2 |   |

MPEG-63V

|   |   |   |   |   |   |   |   |   |   |   |   |   |   |
|---|---|---|---|---|---|---|---|---|---|---|---|---|---|
| 2 | 2 | 0 | 1 | 1 | 2 | 0 | 1 | 0 | 0 | 1 | 1 | 0 | 0 |
| 1 | 0 | 1 | 1 | 1 | 0 | 1 | 0 | 0 | 2 | 0 | 0 | 0 | 1 |
| 1 | 1 | 0 | 1 | 0 | 2 | 0 | 1 | 0 | 1 | 1 | ? | ? | 0 |
| 1 | 2 | 1 | 1 | 1 | 1 | 3 | 0 | 2 | 1 | 1 | 1 | 1 | 1 |
| 0 | 2 | 2 | 1 | 1 | 2 | 2 | 1 | 0 | 0 | 0 | 1 | 2 |   |

ECOCHM 2491

|   |   |   |   |   |   |   |   |   |   |   |   |   |   |
|---|---|---|---|---|---|---|---|---|---|---|---|---|---|
| 2 | 2 | 0 | 1 | 1 | 2 | 0 | ? | 0 | 0 | 0 | 1 | 0 | 0 |
| 1 | 3 | 1 | 1 | 1 | 0 | 1 | 0 | 1 | 1 | 0 | 0 | 0 | 1 |
| 1 | 1 | 1 | 1 | 1 | 2 | 0 | 1 | 1 | 1 | 1 | 1 | ? | ? |
| 1 | 2 | 1 | 1 | 1 | 1 | ? | ? | ? | ? | ? | ? | ? | 1 |
| 0 | 2 | 2 | 1 | 1 | 2 | 2 | 1 | 0 | 0 | 0 | 1 | 2 |   |

*Xenosiren yucateca*

|   |   |   |   |   |   |   |   |   |   |   |   |   |   |
|---|---|---|---|---|---|---|---|---|---|---|---|---|---|
| ? | 2 | ? | 1 | ? | ? | ? | ? | 2 | 1 | 1 | 1 | ? | ? |
| 1 | 3 | 1 | 2 | 0 | 1 | 1 | ? | ? | ? | ? | ? | ? | ? |
| ? | 1 | 1 | ? | 0 | 2 | ? | 1 | 1 | 1 | ? | ? | ? | ? |
| ? | ? | ? | ? | ? | ? | ? | ? | ? | ? | ? | ? | ? | 1 |
| 0 | ? | 3 | 1 | 1 | 2 | ? | 1 | 0 | 0 | 0 | 1 | 2 |   |

*Corystosiren varguezi*

|   |   |   |   |   |   |   |   |   |   |   |   |   |   |
|---|---|---|---|---|---|---|---|---|---|---|---|---|---|
| 2 | ? | 1 | 1 | 1 | 1 | ? | ? | ? | ? | ? | 1 | ? | 0 |
| 1 | 3 | 2 | 2 | 0 | 1 | 1 | ? | 0 | 1 | 0 | ? | 0 | 1 |
| 1 | ? | 0 | ? | 0 | 2 | 0 | 1 | 0 | 0 | 1 | ? | ? | ? |
| ? | ? | ? | 1 | 1 | 1 | ? | ? | ? | ? | ? | ? | ? | 1 |
| 0 | 2 | 3 | 1 | 1 | 2 | 2 | 1 | 0 | 0 | 0 | 1 | 2 |   |

*Rytiodus heali*

|   |   |   |   |   |   |   |   |   |   |   |   |   |   |
|---|---|---|---|---|---|---|---|---|---|---|---|---|---|
| 2 | 2 | 0 | 1 | 2 | 1 | 0 | 2 | 0 | 0 | 0 | 1 | 0 | 0 |
| 1 | 1 | 1 | 2 | 0 | 0 | 1 | 0 | 1 | ? | 0 | 0 | ? | ? |
| 1 | 1 | 0 | ? | 0 | 2 | 0 | 1 | 0 | 1 | 1 | 2 | 2 | 0 |
| 1 | 1 | ? | 1 | 1 | 1 | 3 | 1 | ? | 1 | 1 | 1 | ? | 1 |
| 0 | 2 | 3 | 1 | 1 | 2 | 2 | 1 | 0 | 0 | 0 | 1 | 2 |   |

*Rytiodus capgrandi*

|   |   |   |   |   |   |   |   |   |   |   |   |   |   |
|---|---|---|---|---|---|---|---|---|---|---|---|---|---|
| ? | 1 | 1 | 1 | 1 | ? | ? | 1 | 0 | ? | ? | 1 | ? | ? |
| 1 | 1 | 1 | 2 | 1 | 0 | 1 | ? | 0 | ? | ? | ? | ? | 1 |
| 1 | 1 | 0 | ? | 0 | 2 | 0 | ? | 0 | 1 | ? | ? | ? | ? |
| ? | ? | ? | ? | ? | 1 | ? | ? | ? | ? | ? | ? | ? | 1 |
| 0 | 2 | 3 | 1 | 1 | 2 | 2 | 1 | 0 | 0 | 0 | 1 | 2 |   |
